# Supplementary material for: Hybrid TiO2–Polyaniline Photocatalysts and their Application in Building Gypsum Plasters
Source: PubMed Central journal article supplement (PMC7177723; doi:10.3390/ma13071516), 2020-03-26
Supplement: materials-13-01516-s001.pdf [file materials-13-01516-s001.pdf]

Supplementary Materials

# Hybrid TiO<sub>2</sub>–Polyaniline Photocatalysts and their Application in Building Gypsum Plasters

Agnieszka Sulowska <sup>1,\*</sup>, Izabela Wysocka <sup>1</sup>, Daniel Pelczarski <sup>2</sup>, Jakub Karczewski <sup>3</sup> and Anna Zielińska-Jurek <sup>1,\*</sup>

<sup>1</sup> Department of Process Engineering and Chemical Technology, Faculty of Chemistry, Gdansk University of Technology, 80-232 Gdansk, Poland; izabela.wysocka@pg.edu.pl

<sup>2</sup> Department of Physics of Electronic Phenomena, Faculty of Applied Physics and Mathematics, Gdansk University of Technology, 80-232 Gdansk, Poland; daniel.pelczarski@pg.edu.pl

<sup>3</sup> Department of Solid State Physics, Faculty of Applied Physics and Mathematics, Gdansk University of Technology, 80-232 Gdansk, Poland; jakub.karczewski@pg.edu.pl

\* Correspondence: sulowska.as@gmail.com (A.S.); annjurek@pg.edu.pl (A.Z.-J.)

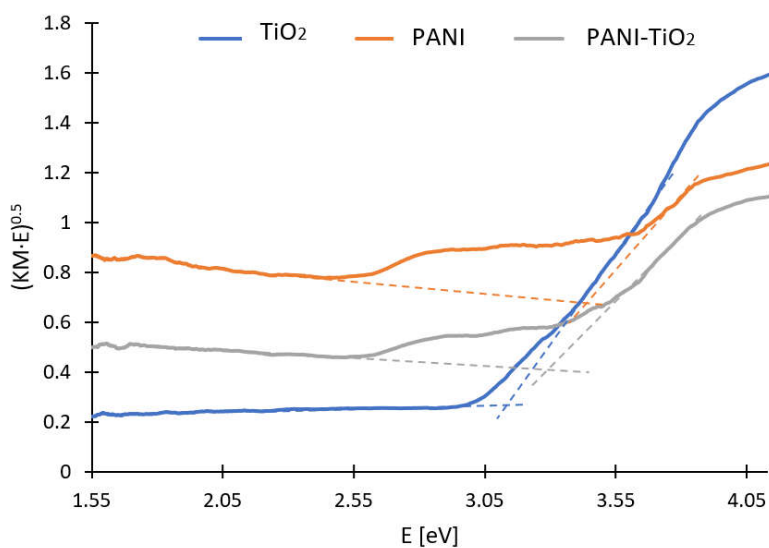

**Figure S1.** The Tauc plots for TiO<sub>2</sub>, PANI and PANI-TiO<sub>2</sub>.

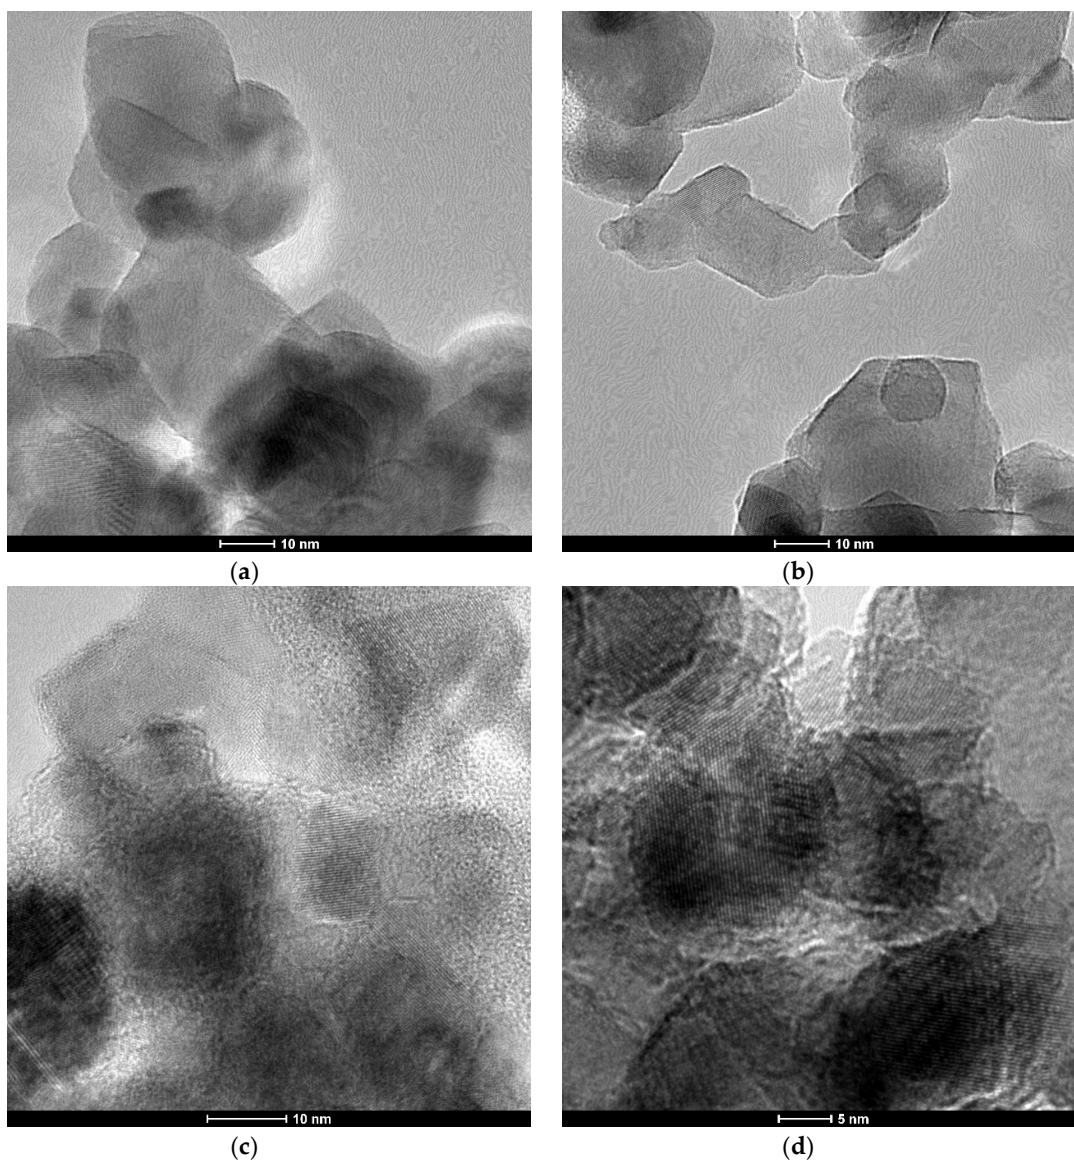

Figure 2. a–d: TEM microscopic images of PANI/TiO<sub>2</sub> composite.

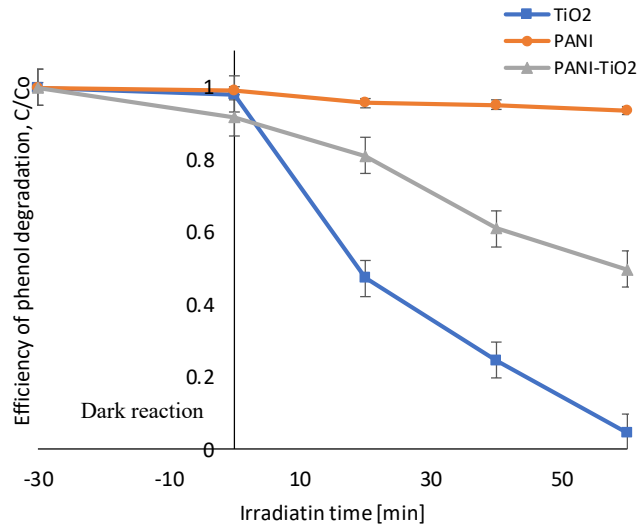

**Figure S3.** Photocatalytic activity of TiO<sub>2</sub>, PANI and PANI-TiO<sub>2</sub> in reaction of phenol degradation under UV-Vis light irradiation.

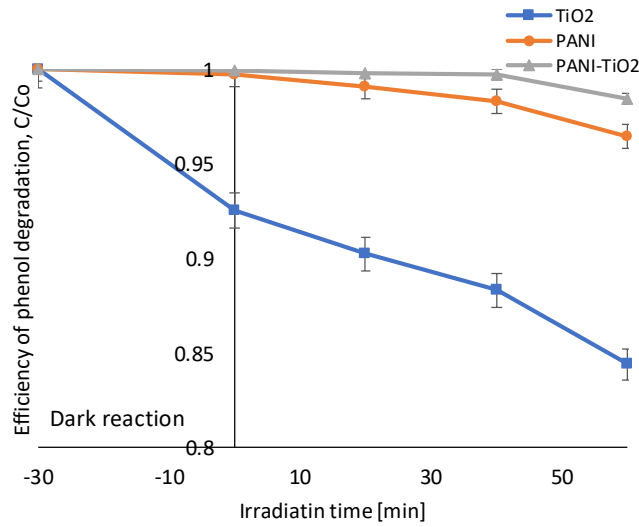

**Figure S4.** Photocatalytic activity of TiO<sub>2</sub>, PANI and PANI-TiO<sub>2</sub> in reaction of phenol degradation under Vis > 400 nm light irradiation.

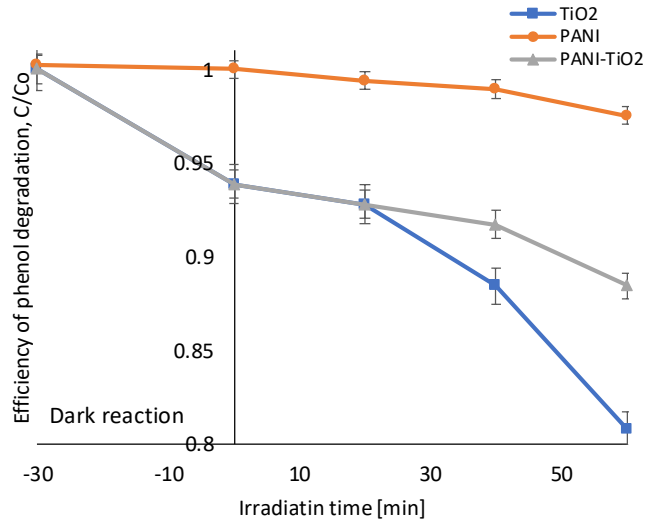

**Figure S5.** Photocatalytic activity of TiO<sub>2</sub>, PANI and PANI-TiO<sub>2</sub> in reaction of phenol degradation under Vis > 420 nm light irradiation.

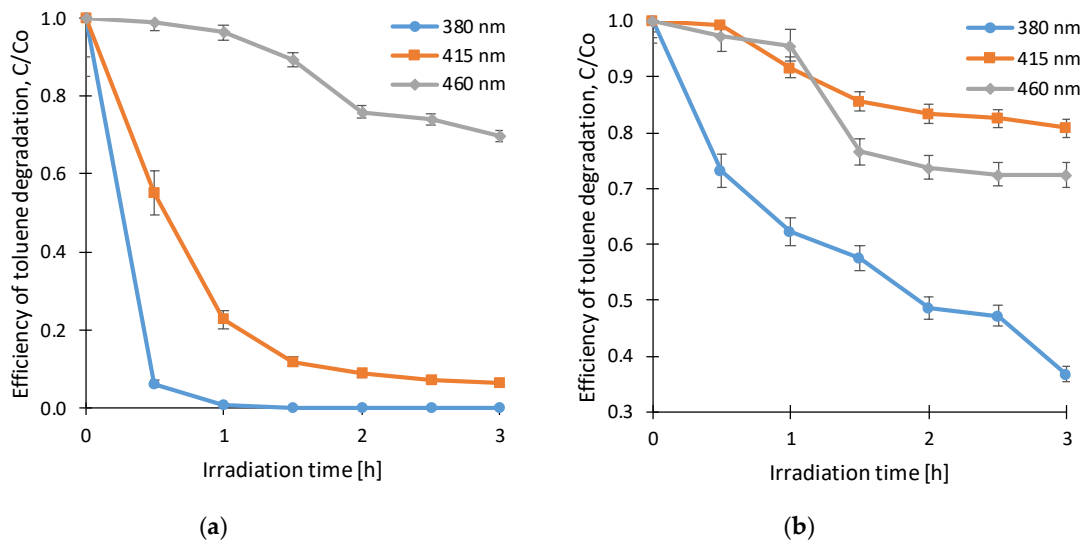

**Figure S6.** Toluene degradation in time. The effect of irradiation source with maximum wavelength emission at 380 nm, 415 nm and 460 nm for a) TiO<sub>2</sub> and b) PANI-TiO<sub>2</sub> hybrid nanocomposite.

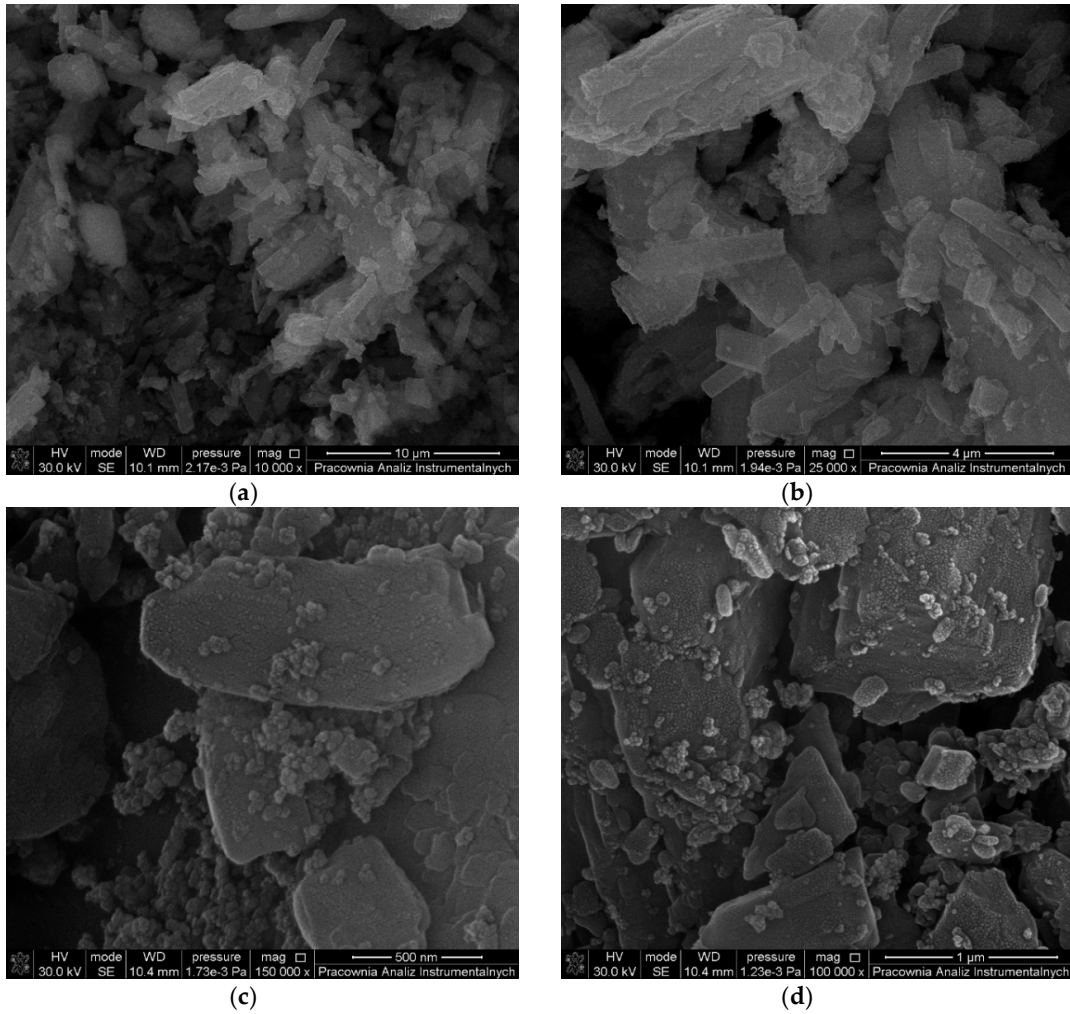

Figure 7. a–d: SEM images of gypsum surface modified with PANI-TiO<sub>2</sub>.

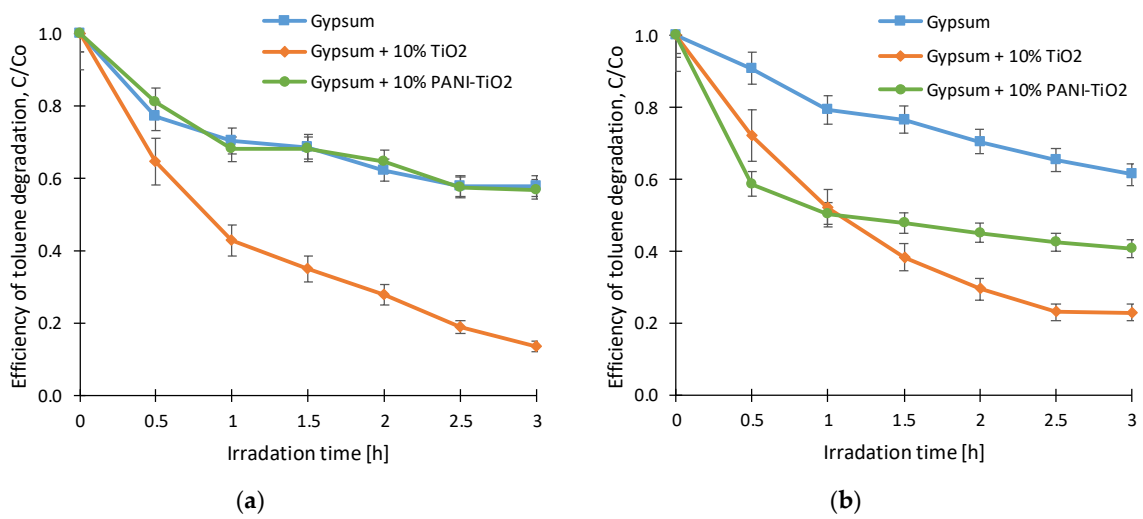

Figure S8. Toluene degradation in time for gypsum, gypsum + 10% TiO<sub>2</sub>, and gypsum + 10% PANI-TiO<sub>2</sub> using a) LEDs with a maximum wavelength emission at 380 nm, b) LEDs irradiation source with a maximum wavelength emission at 460 nm.
